# Supplementary material
Source: publisher figshare collection journal article supplement (https://tandf.figshare.com/ndownloader/files/15448919)
Supplement: Supplementary file 1 [file 15448919]

**Supplemental Table 1**. Brassicaceae species and common names reported in studies.

| Scientific name | Common name |
| --- | --- |
| *Brassica chinesis* L. | bok choi, pak choi |
| *Brassica juncea* L. Czern. | mustard greens |
| *B. oleraceae* L. var. *acephala* DC. | kale |
| *B. oleracea* var. *capitata* L. | cabbage, green |
| *B. oleracea* var. *gemmifera* DC. | Brussels sprouts |
| *B. oleracea* L. var. *botrytis* L. | broccoli |
| *B. oleracea* var. *italica* Plenck | sprouting broccoli |
| *B. oleracea* var. *viridis* L. | collards |
| *B. napus* L.var. *napobrassica* (L.) Rchb. | rutabaga |
| *B. napus* subsp. *oleifera* [DC.] Metzg. | oilseed rape (canola) |
| *B. nigra* (L.) W. D. J. Koch | black mustard |
| *B*. *rapa* L. | birdsrape mustard |
| *B. rapa* subsp. *chinenis* (L.) Hanelt | Chinese cabbage |
| *B. rapa* subsp. *nipposinica* L. H. Bailey] Hanelt | mizuna |
| *B. rapa* subsp. *rapa* L. | turnip |
| *B. rapa* x *B. oleraceae* L. var. *acephala* | forage rape |
| *B. tournefortii* Gouan | Asian mustard |
| *Cardamine oligosperma* Nutt. | little bittercress |
| *Eruca vesicaria* (L.) Cav. subsp. *sativa* (Mill.) Thell. | arugula |
| *Raphanus* *raphanistrum* L. | wild radish |
| *R. sativus* var. *sativus* L. | radish (daikon and red) |
| *Sinapis* *arvensis* L. | wild mustard |

**Supplemental Table 2**. Blackleg, light leaf spot, and white leaf spot detections in additional Brassicaceae surveys in 2014 and 2015.

| Apr - Jun 2014 | | | | | Dec 2014 - Apr 2015 | | | | |
| --- | --- | --- | --- | --- | --- | --- | --- | --- | --- |
| County | Plant type | BL1,2 | LLS1,2 | WLS1,2 | County | Plant type | BL1,2 | LLS1,2 | WLS1,2 |
| *Specialty seed crops* | |  |  |  | *Specialty seed crops* | |  |  |  |
| Polk | cabbage | + |  |  | Marion | cabbage |  |  |  |
| Marion | cabbage | + |  |  | Linn | cabbage | 100 |  |  |
| Marion | cabbage |  |  |  | Lane | cabbage |  | + |  |
| Marion | cabbage |  |  |  | Lane | cabbage | 100 | + |  |
| Linn | Chinese cabbage | + |  |  | Lane | cabbage | 100 | + |  |
| Linn | Asian mustard | + |  |  | Lane | cabbage | 100 | + | + |
| Benton | collards | + |  |  | Benton | Chinese cabbage | + |  | + |
| Benton | kale | + |  |  | Benton | Chinese cabbage | 100 |  | + |
| Benton | kale | + |  |  | Marion | Chinese cabbage |  | + |  |
| Benton | kale | + |  |  | Marion | forage rape | 99 | + |  |
| Benton | kale | + |  |  | Benton | kale |  |  | + |
| Marion | kale |  |  |  | Marion | kale | 40 |  |  |
| Marion | kale | + |  |  | Marion | kale | 100 |  |  |
| Marion | kale | + |  | + | Marion | kale | 40 |  |  |
| Benton | mizuna | + | + |  | Marion | radish, red |  | + |  |
| Polk | radish |  | + |  | Marion | radish, red |  | + |  |
| Linn | turnip |  | + |  | Benton | turnip | + |  |  |
| Linn | turnip |  | + |  | Benton | turnip | 100 | + |  |
| Linn | turnip |  |  | + | Linn | turnip | 100 |  |  |
| Yamhill | turnip |  | + | + | Linn | turnip | 100 |  |  |
| Yamhill | turnip |  | + |  | Linn | turnip | 100 | + | + |
| *Vegetable crops* | |  |  |  | Linn | turnip |  | 100 | + |  |
| Benton | radish |  |  |  | Linn | turnip | 100 | + |  |
| Polk | cabbage | + |  |  | Marion | turnip | 100 | + | + |
| Marion | cabbage | + |  |  | Yamhill | turnip |  |  |  |
| Marion | cabbage |  |  |  | Yamhill | turnip | 100 |  |  |
| Marion | cabbage |  |  |  | *Vegetable crops* | |  |  |  |
| Linn | Chinese cabbage | + |  |  | Benton | arugula | 100 |  | + |
| Linn | Asian mustard | + |  |  | Marion | bok choi | + | + |  |
| Benton | collards | + |  |  | Benton | sprouting broccoli | 100 |  |  |
| *Forage & cover crops* | |  |  |  | Marion | broccoli | 1 |  |  |  |
| Marion | *Brassica* cover crop |  | + |  | Marion | Brussels sprouts | + |  |  |
| Marion | forage turnip | + | + | + | Benton | mixed Brassicas |  |  |  |
| *Volunteer crops & weeds* | |  |  |  | Benton | collards |  |  |  |  |
| Linn | volunteer mustard | + | + | + | Marion | collards | + |  |  |
| Linn | volunteer radish |  |  |  | Benton | kale | 100 | + | + |
| Polk | volunteer turnip |  | + |  | Marion | kale | + |  | + |
| Yamhill | volunteer turnip | + | + | + | Marion | kale | 5 |  |  |
| Yamhill | volunteer turnip | + |  |  | Benton | rutabaga | 100 |  |  |
| Marion | birdsrape mustard | + | + |  | *Volunteers & weeds* | |  |  |  |
| Marion | birdsrape mustard | + | + |  | Yamhill | volunteer *Brassica* | 100 |  |  |
| Marion | black mustard | + | + | + | Polk | birdsrape mustard | 30 | 30 | 30 |
| Polk | wild mustard |  |  |  | Marion | birdsrape mustard |  | 20 | 60 |
| Marion | wild radish |  | + |  | Marion | birdsrape mustard | 50 | 50 |  |
|  |  |  |  |  | Marion | *Brassica* weed |  |  |  |
|  |  |  |  |  | Marion | *Brassica* weed |  |  |  |

**Supplemental Table 2** continued.

|  |  | | | | December 2014 - April 2015 | | | | |
| --- | --- | --- | --- | --- | --- | --- | --- | --- | --- |
|  |  |  |  |  | County | Plant type | BL1,2 | LLS1,2 | WLS1,2 |
|  |  |  |  |  | Marion | *Brassica* weed |  | 70 |  |
|  |  |  |  |  | Polk | *Brassica* weed | 20 | 60 | 20 |
|  |  |  |  |  | Polk | *Sinapis* weed | 20 | 40 |  |
|  |  |  |  |  | Lane | wild radish |  | + |  |

1Blackleg (BL), light leaf spot (LLS), and/or white leaf spot (WLS) levels were visually estimated, + denotes that incidence and severity were not determined.

2Absence of data indicates that no plants surveyed had obvious symptoms of the respective disease at time of survey.
